# Supplementary material for: Manipulating the ambipolar characteristics of pentacene-based field-effect transistors
Source: Royal Society of Chemistry journal article supplement (doi:10.1039/c3tc31546k), 2013-12-10
Supplement: c3tc31546k.pdf [file c3tc31546k.pdf]

## Supplementary Information

# Manipulating the ambipolar characteristics of pentacene-based field-effect transistors

Liang-Yun Chiu,<sup>a</sup> Horng-Long Cheng,<sup>\*a</sup> Hsin-Yuan Wan,<sup>a</sup> Wei-Yang Chou<sup>a</sup> and Fu-Ching Tang<sup>b</sup>

<sup>a</sup> *Department of Photonics, Advanced Optoelectronic Technology Center, National Cheng Kung University, Tainan 701, Taiwan*

<sup>b</sup> *Department of Physics, National Cheng Kung University, Tainan 701, Taiwan*

### Corresponding Author

\*E-mail: [shlcheng@mail.ncku.edu.tw](mailto:shlcheng@mail.ncku.edu.tw)

## 1. Surface properties of gate dielectrics

**Table S1. Properties of polymer buffer layers on silicon dioxide (SiO<sub>2</sub>) gate dielectric and the corresponding interfacial tension ( $R_{12}$ )**

| Gate dielectric or buffer | Thickness (nm) | Surface energy                      |                                     |                               | Surface roughness (Å) | $R_{12}$ (mJ/m <sup>2</sup> ) |
|---------------------------|----------------|-------------------------------------|-------------------------------------|-------------------------------|-----------------------|-------------------------------|
|                           |                | $\gamma^{d^a}$ (mJ/m <sup>2</sup> ) | $\gamma^{p^a}$ (mJ/m <sup>2</sup> ) | $\gamma$ (mJ/m <sup>2</sup> ) |                       |                               |
| SiO <sub>2</sub>          | 400            | 23.0                                | 32.6                                | 55.6                          | 17.0                  | 21.66                         |
| PVDF                      | 42             | 30.4                                | 15.7                                | 46.1                          | 19.1                  | 6.16                          |
| PVNP                      | 49             | 40.9                                | 9.0                                 | 49.9                          | 3.4                   | 2.03                          |
| <i>h</i> -PMMA            | 426            | 33.3                                | 8.1                                 | 41.4                          | 2.7                   | 1.80                          |
| PS                        | 55             | 42.3                                | 0.3                                 | 42.6                          | 4.9                   | 1.17                          |
| <i>t</i> -PMMA            | 188            | 33.7                                | 6.1                                 | 39.7                          | 3.8                   | 0.95                          |
| <i>d</i> -PMMA            | 52             | 35.6                                | 5.8                                 | 41.4                          | 5.4                   | 0.72                          |
| <i>ls</i> -PMMA           | 113            | 36.2                                | 5.6                                 | 41.8                          | 3.8                   | 0.65                          |
| <i>hs</i> -PMMA           | 44             | 36.3                                | 4.4                                 | 40.7                          | 6.7                   | 0.31                          |
| <i>s</i> -PMMA            | 63             | 36.8                                | 3.7                                 | 40.5                          | 4.0                   | 0.14                          |

<sup>a</sup>  $\gamma^d$  and  $\gamma^p$  denoted as the dispersion and polar force components of surface free energy, respectively.

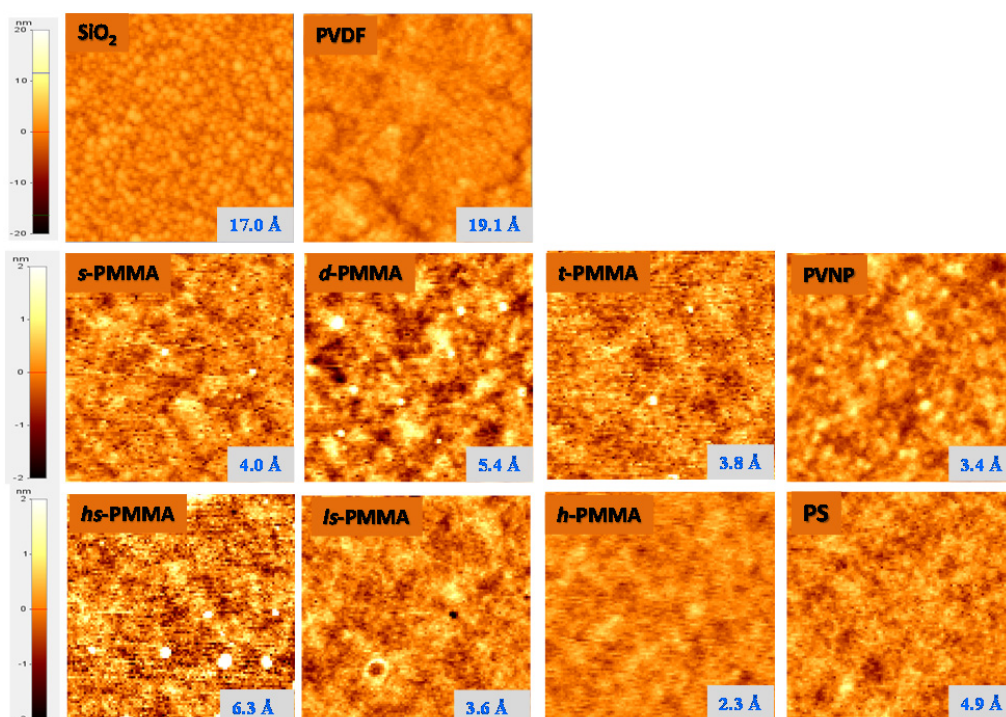

**Fig. S1** AFM images (2 μm x 2 μm) of SiO<sub>2</sub> and various polymer buffer layers. The root-mean-square roughness is also shown.

## 2. XRD and AFM analysis of other pentacene films

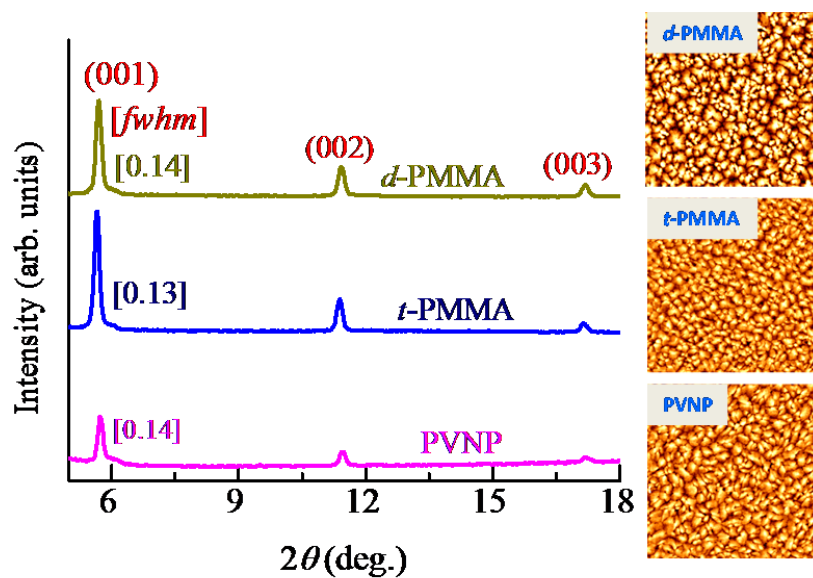

**Fig. S2** XRD pattern of the pentacene films (thickness of ca. 60 nm) on various surface-modified dielectrics. Note: the full width at half maximum (FWHM) of the (001) diffraction peak was also indicated. Inset: AFM images ( $5\ \mu\text{m} \times 5\ \mu\text{m}$ ) of the pentacene films with a thickness of ca. 10 nm.

### 3. Electrical characteristics of pentacene FETs and its complementary-like inverter

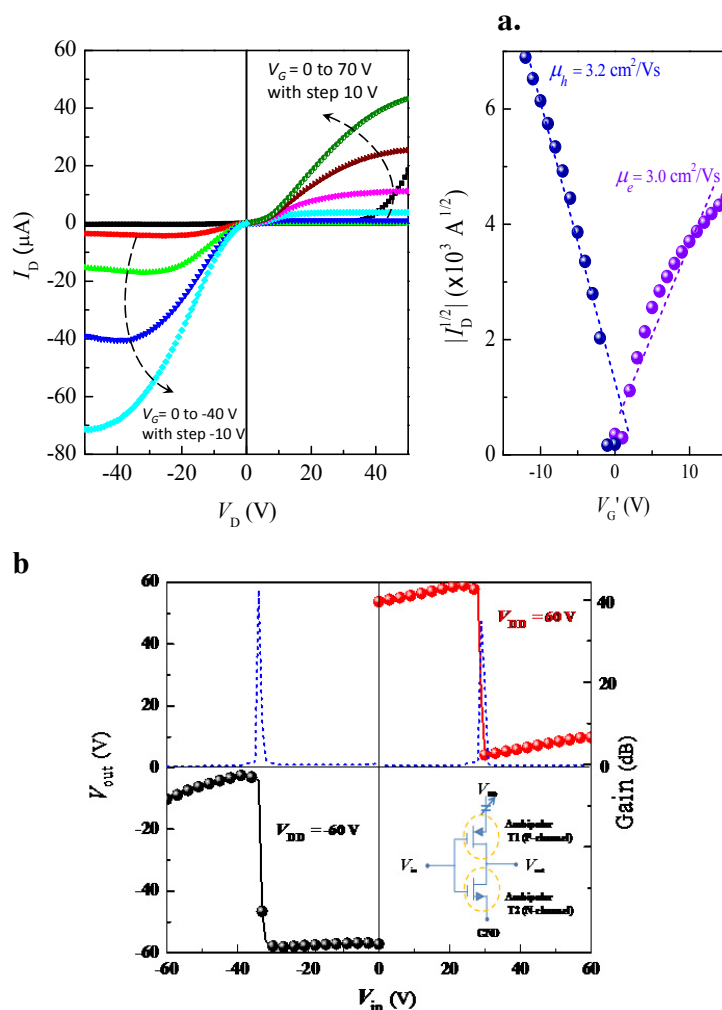

**Fig. S3** (a) *p*-Channel and *n*-channel electrical characteristics of pentacene FETs with *s*-PMMA surface-modified gate dielectrics. Left panel: output characteristics; Right panel: transfer characteristics.  $I_D$ : drain current,  $V_D$ : source-to-drain bias,  $V_G$ : gate bias, and  $V_G'$ : effective gate bias. (b) Transfer characteristics of complementary-like inverters based on two identical ambipolar pentacene FETs with *s*-PMMA surface modification. Depending on the polarity of the supply voltage  $V_{DD}$ , the inverter works in the first or the third quadrant. Top left and right (dashed lines): the corresponding signal gains. Inset bottom right: Schematic circuit configuration of a complementary-like inverter.

#### 4. Raman spectra

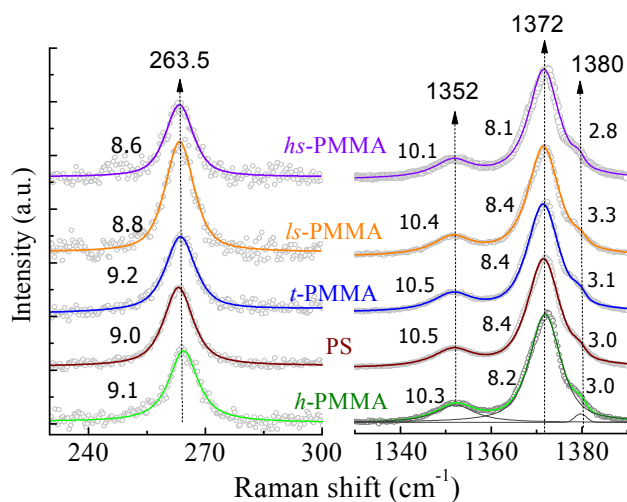

**Fig. S4** Raman spectra ( $\lambda_{exc} = 633$  nm) of the pentacene films (thickness of ca. 10 nm) grown on various dielectric surfaces. The spectra were normalized to the intensity of the 1371 cm<sup>-1</sup> band. The intensities of all spectra in left panel were enlarged ten times. The Gaussian/Lorentzian functions used for the deconvolution are presented by a thin solid line. The thick solid lines represent the overall fit, while the open cycles to the experimental data. The dashed lines serve as guidelines. Full width at half maximum (*fwhm*) of the selected bands are also shown.
